# Supplementary material
Source: Springer Nature journal article supplement (https://www.springermedizin.de/resource/supplementary/12880_2012_187_MOESM3_ESM.pdf/9450186)

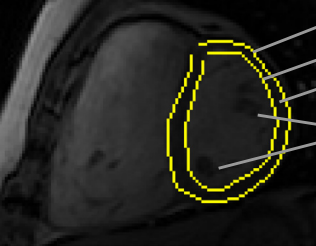

epicardium

endocardium

cardiac wall

papillary muscles

Supplement: MOESM3 [file 9450186]
